# Supplementary material for: Synergistic Effect of Low Molecular Weight Polyethylenimine and Polyethylene Glycol Components in Dynamic Nonviral Vector Structure, Toxicity, and Transfection Efficiency
Source: MDPI journal article supplement (doi:10.3390/molecules24081460), 2019-04-12
Supplement: s1 [file s1]

# Synergistic effect of low molecular weight polyethylenimine and polyethylene glycol components in dynamic non-viral vectors structure, toxicity and transfection efficiency

Bogdan Florin Craciun, Gabriela Gavril, Dragos Peptanariu, Laura Elena Ursu, Lilia Clima, Mariana Pinteala

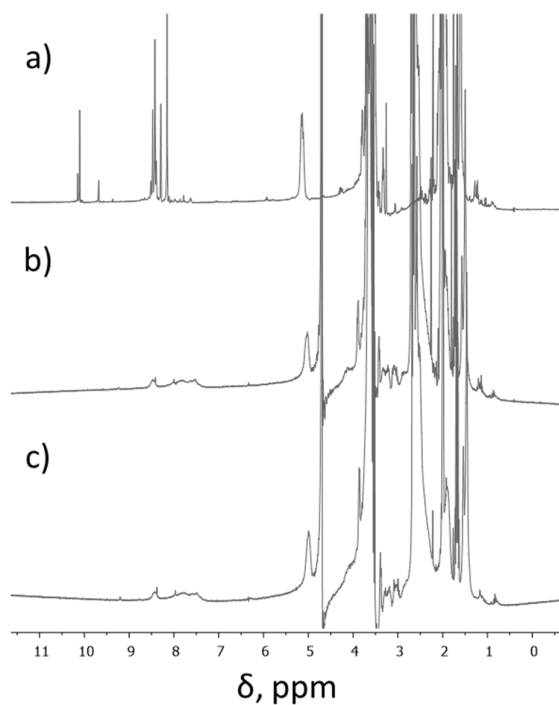

**Figure S1.** <sup>1</sup>H-NMR spectra of: a) Ia', Ib' intermediates in CD<sub>3</sub>CN; b) F6 in D<sub>2</sub>O, c) F7 in D<sub>2</sub>O.

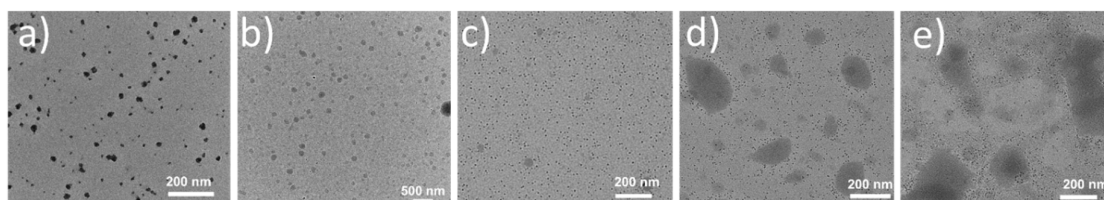

**Figure S2.** TEM images for the DCFs aqueous solutions: a) F1; b) F2; c) F3; d) F4; e) F5.

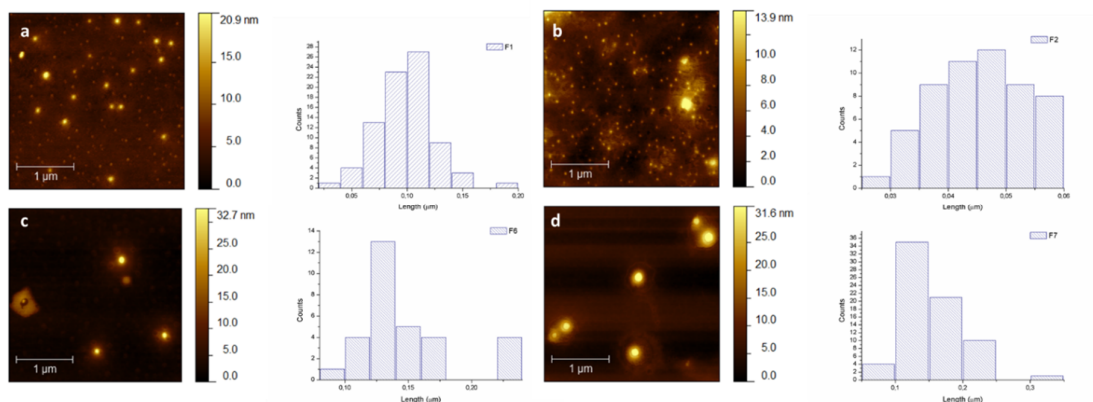

**Figure S3.** AFM images and corresponding average size distribution of the synthesized DCFs in water: a) F1 (~ 100 nm); b) F2 (~ 45 nm); c) F6 (~ 140 nm); d) F7 (~ 150 nm).

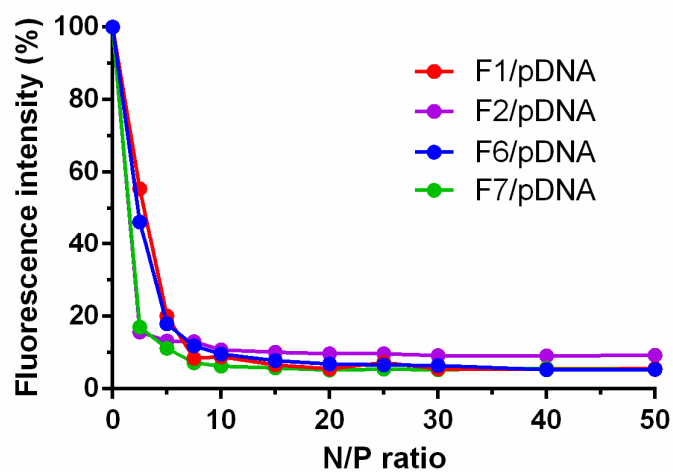

**Figure S4.** Gel Red dye exclusion assay. Fluorescence intensity of the Gel Red as a function of N/P ratio of formed polyplexes.
